# Supplementary material for: ERBB4 Promoter Polymorphism Is Associated with Poor Distant Disease-Free Survival in High-Risk Early Breast Cancer
Source: PubMed Central journal article supplement (PMC4103820; doi:10.1371/journal.pone.0102388), 2014-07-18
Supplement: pone.0102388.s001.pdf [file pone.0102388.s001.pdf]

**Supplementary table 1:** Associations of immunohistochemical ErbB4 staining intensity with clinicopathological parameters

|                  | <b>ErbB4 staining intensity</b> |          |          |         | <i>P</i> -value         |
|------------------|---------------------------------|----------|----------|---------|-------------------------|
|                  | negative                        | low      | moderate | strong  |                         |
|                  | n (%)                           | n (%)    | n (%)    | n (%)   |                         |
| <b>pT</b>        |                                 |          |          |         |                         |
| <10 mm           | 13 (18)                         | 28 (40)  | 25 (35)  | 5 (7)   | n = 923<br>0.976        |
| 11-20 mm         | 57 (17)                         | 134 (41) | 106 (32) | 32 (10) |                         |
| >20 mm           | 99 (19)                         | 201 (38) | 172 (33) | 51 (10) |                         |
| <b>pN</b>        |                                 |          |          |         |                         |
| 0                | 22 (22)                         | 38 (38)  | 30 (30)  | 10 (10) | n = 926<br>0.85         |
| 1-3              | 100 (18)                        | 229 (41) | 180 (32) | 54 (9)  |                         |
| >3               | 48 (18)                         | 97 (37)  | 94 (36)  | 24 (9)  |                         |
| <b>Histology</b> |                                 |          |          |         |                         |
| ductal           | 119 (17)                        | 297 (41) | 242 (33) | 66 (9)  | n = 926<br>NA*          |
| lobular          | 50 (27)                         | 58 (32)  | 56 (31)  | 19 (10) |                         |
| other            | 1 (5)                           | 9 (47)   | 6 (32)   | 3 (16)  |                         |
| <b>Grade</b>     |                                 |          |          |         |                         |
| 1                | 27 (20)                         | 53 (40)  | 42 (32)  | 10 (8)  | n = 887<br>0.844        |
| 2                | 65 (18)                         | 140 (38) | 122 (33) | 41 (11) |                         |
| 3                | 70 (18)                         | 159 (41) | 124 (32) | 34 (9)  |                         |
| <b>ER</b>        |                                 |          |          |         |                         |
| -                | 50 (20)                         | 121 (47) | 67 (26)  | 17 (7)  | n = 926<br><b>0.003</b> |
| +                | 120 (18)                        | 243 (36) | 237 (35) | 71 (11) |                         |
| <b>PR</b>        |                                 |          |          |         |                         |
| -                | 73 (19)                         | 163 (42) | 118 (30) | 35 (9)  | n = 925<br>0.43         |
| +                | 97 (18)                         | 200 (37) | 186 (35) | 53 (10) |                         |
| <b>ERBB2</b>     |                                 |          |          |         |                         |
| -                | 136 (19)                        | 275 (38) | 248 (34) | 61 (9)  | n = 926<br>0.052**      |
| +                | 34 (18)                         | 89 (43)  | 56 (27)  | 27 (13) |                         |

\* There are too few patients in the "other" category to perform a chi square test. However, there is a difference between ductal and lobular histology; ErbB4 negativity is associated with lobular histology ( $P = 0.004$ )

\*\* The nearly significant *P*-value is probably due to coincidence, since there is no clear trend in the percentages
